# Supplementary material for: CD4 and CD8 T Cell Memory Interactions Alter Innate Immunity and Organ Injury in the CLP Sepsis Model
Source: PubMed Central journal article supplement (PMC7715000; doi:10.3389/fimmu.2020.563402), 2020-11-20
Supplement: DataSheet_1.pdf [file DataSheet_1.pdf]

| Target                                                | Clone        | Cat. Number | Company       | Fluorophore   | Host Species | Target Species |
|-------------------------------------------------------|--------------|-------------|---------------|---------------|--------------|----------------|
| CD90.2 (Thy1.2)                                       | 53-2.1       | 140318      | Biolegend     | BV605         | Rat          | Mouse          |
| CD44                                                  | IM7          | 61-0441082  | eBioscience   | PE-eFluor610  | Rat          | Mouse/Human    |
| CD8a                                                  | 53-6.7       | 100730      | Biolegend     | AF700         | Rat          | Mouse          |
| CD4                                                   | RM4-5        | 563727      | BD Horizon    | BV786         | Rat          | Mouse          |
| CD62L                                                 | MEL-14       | 564108      | BD Bioscience | BV650         | Rat          | Mouse          |
| CD11a                                                 | M17/a        | 740676      | BD Bioscience | BV711         | Rat          | Mouse          |
| Ly6C                                                  | HK1.4        | 128013      | Biolegend     | Pac Blue      | Rat          | Mouse          |
| Ly6C                                                  | HK1.4        | 128024      | Biolegend     | AF700         | Rat          | Mouse          |
| CD11c                                                 | HL3          | 564079      | BD Bioscience | BV650         | Hamster      | Mouse          |
| Ly6G                                                  | 1A8          | 127643      | Biolegend     | BV711         | Rat          | Mouse          |
| CD11b                                                 | M1/70        | 101256      | Biolegend     | PE/Dazzle594  | Rat          | Mouse/Human    |
| MHCII (I-A/I-E)                                       | M5/114.15.2  | 17-5321-81  | eBioscience   | APC           | Rat          | Mouse          |
| TNFA                                                  | MP6-XT22     | 506318      | Biolegend     | PacBlue       | Rat          | Mouse          |
| IL17a                                                 | TC11-18H10.1 | 506920      | Biolegend     | PerCP/Cy5.5   | Rat          | Mouse          |
| IFN gamma                                             | XMG1.2       | 25-7311-82  | eBioscience   | PE/Cy7        | Rat          | Mouse          |
| IL1 beta                                              | NJTEN3       | 47-7114-82  | eBioscience   | APC-eFluor700 | Rat          | Mouse          |
| IL2                                                   | JES6-5H4     | 503814      | Biolegend     | AF647         | Rat          | Mouse          |
| Granzyme B                                            | QA16A02      | 372214      | Biolegend     | PE/Cy7        | Mouse        | Human/Mouse    |
|                                                       |              |             |               |               |              |                |
| In Vivo                                               |              |             |               |               |              |                |
| Ultra-LEAF Purified anti-Mouse CD3e                   | 145-2C11     | 100359      | Biolegend     |               | Hamster      | Mouse          |
| Ultra-LEAF Purified Armenian Hamster IgG Isotype Ctrl | HTK888       | 400959      | Biolegend     |               | Hamster      | Mouse          |

**Supplemental Table 1. Antibodies used in this work.**

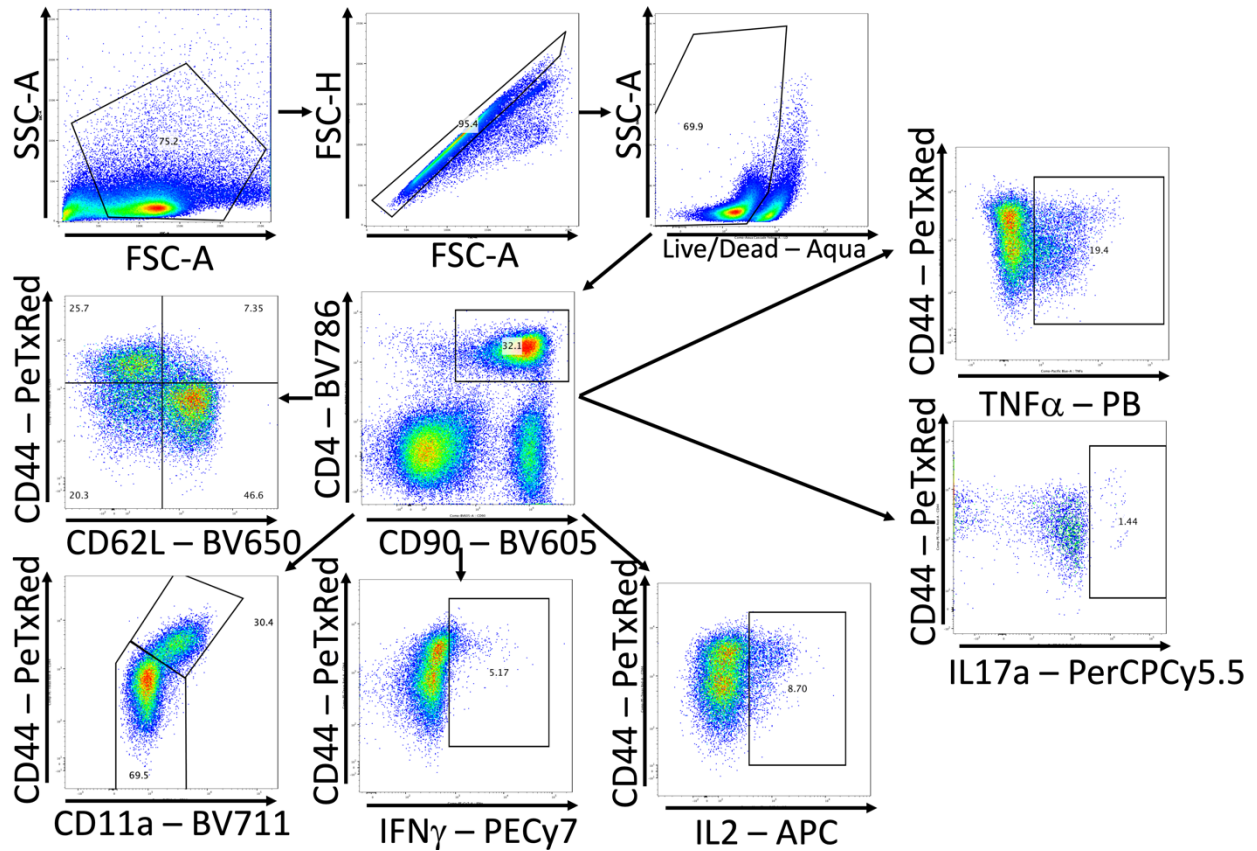

**Supplemental Figure 1. Gating Strategy for CD4 T cells.** Splenic T cell populations shown from educated mouse 24h following CLP without TCR stimulation for all except cytokine staining, which is shown following TCR stimulation.

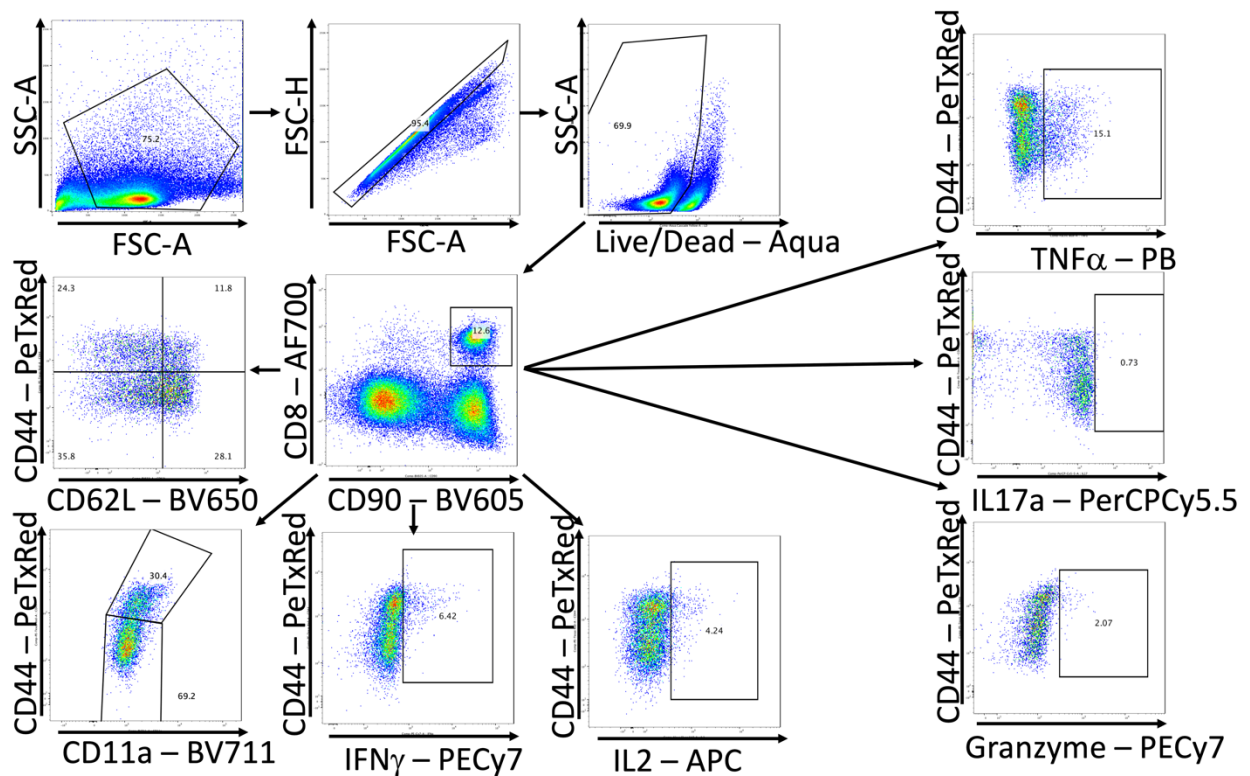

**Supplemental Figure 2. Gating Strategy for CD8 T cells.** Splenic T cell populations shown from educated mouse 24h following CLP without TCR stimulation for all except cytokine staining, which is shown following TCR stimulation.

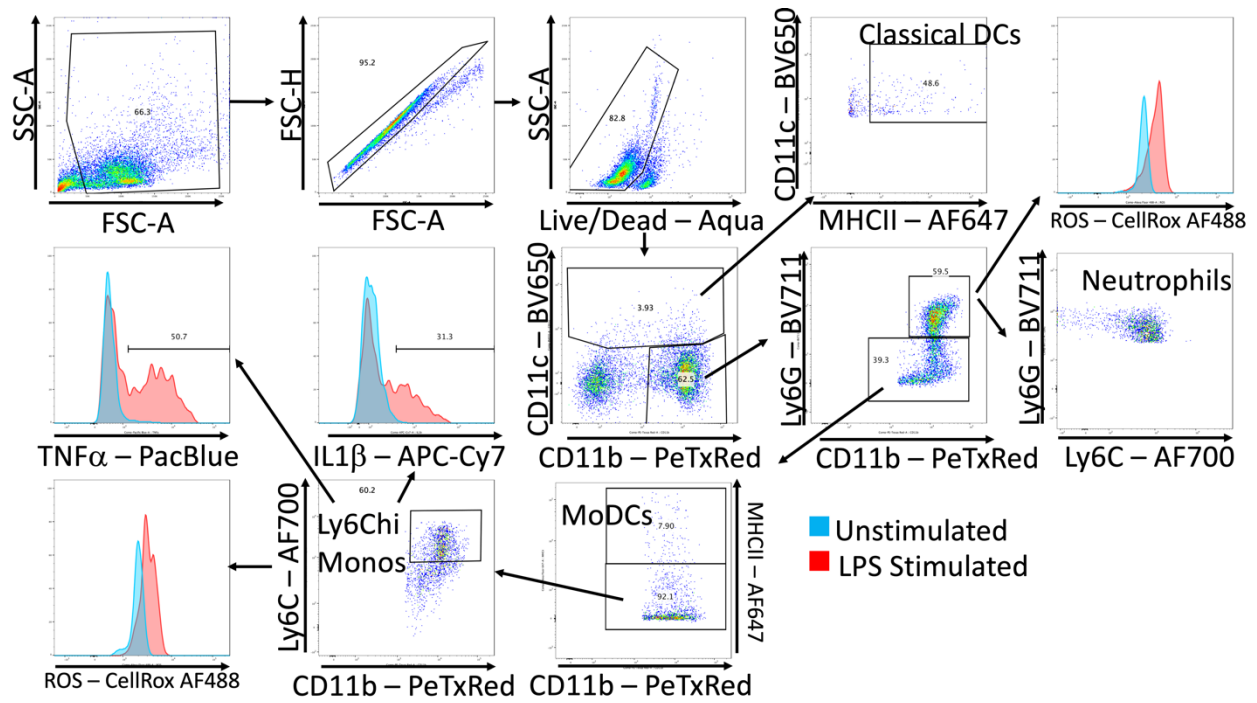

**Supplemental Figure 3. Gating Strategy for Innate Immune cells.** Hepatic innate immune populations shown from educated mouse 24h following CLP. For cytokine flow cytometric diagrams, red represents LPS stimulated sample and blue is control unstimulated sample from the same mouse.

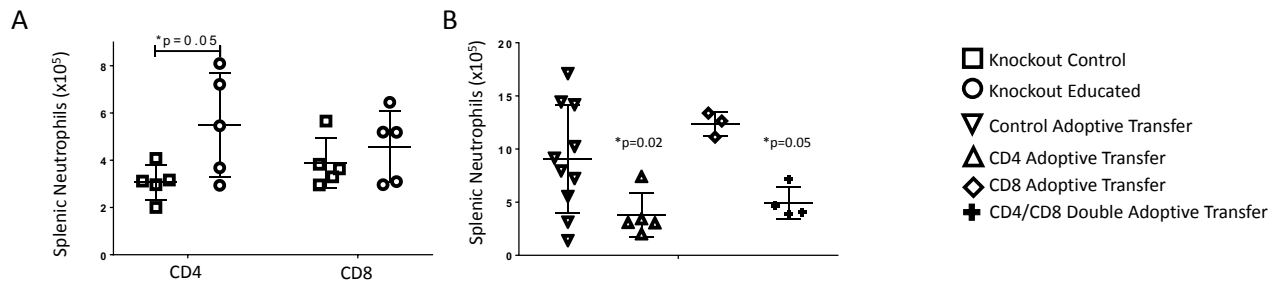

**Supplemental Figure 4. Effects of isolated and combined CD4 and CD8 memory on CLP-induced changes in the innate immune system.** CLP was performed on educated (circles) and control (squares) CD4<sup>-/-</sup> (CD8 T cells only) and CD8<sup>-/-</sup> (CD4 T cells only) mice. In a separate cohort, flow-cytometry assisted sorted CD4 memory T cells, CD8 memory T cells or both were transferred into congenic B6.SJL mice. Seven days later, these mice and untreated control mice underwent CLP. In all groups, liver and spleen were harvested 24h following CLP and peritoneal cavity washings were obtained. Cell samples were analyzed using flow cytometry. Gating: moDCs: FSC/SSC, singlets, Live, CD11c<sup>-</sup>/CD11b<sup>+</sup>, CD11b<sup>+</sup>/Ly6G<sup>-</sup>, CD11b<sup>+</sup>/MHCII<sup>+</sup>; Inflammatory monocytes: FSC/SSC, singlets, Live, CD11c<sup>-</sup>/CD11b<sup>+</sup>, CD11b<sup>+</sup>Ly6G<sup>-</sup>, CD11b<sup>+</sup>MHCII<sup>-</sup>, CD11b<sup>+</sup>/Ly6Chi; Neutrophils: FSC/SSC, singlets, Live, CD11c<sup>-</sup>/CD11b<sup>+</sup>, CD11b<sup>+</sup>Ly6Cint, Classical DCs: FSC/SSC, singlets, Live, CD11c<sup>+</sup>/CD11b<sup>-</sup>, CD11c<sup>+</sup>/MHCII<sup>+</sup>. N=4-5/group for knockout mice, N=4-9 for adoptive transfer experiments. Data as mean ± SEM, \*p<0.05 by two-way T test for experiments involving knockout mice and by 2-way ANOVA with Dunnett correction for multiple comparisons for adoptive transfer experiments.

a. Total splenic neutrophils in CD8<sup>-/-</sup> mice (CD4 memory T cells only) or CD4<sup>-/-</sup> mice (CD8 memory T cells only). Control (squares) and Educated (circles) mice.

b. Total splenic neutrophils following adoptive transfer of CD4, CD8 or both CD4 and CD8 memory T cells or sham control 24h following CLP 7 days following transfer. Controls (squares), CD4 memory T cells (triangles), CD8 memory T cells (diamonds), both CD4 and CD8 memory T cells (circles).

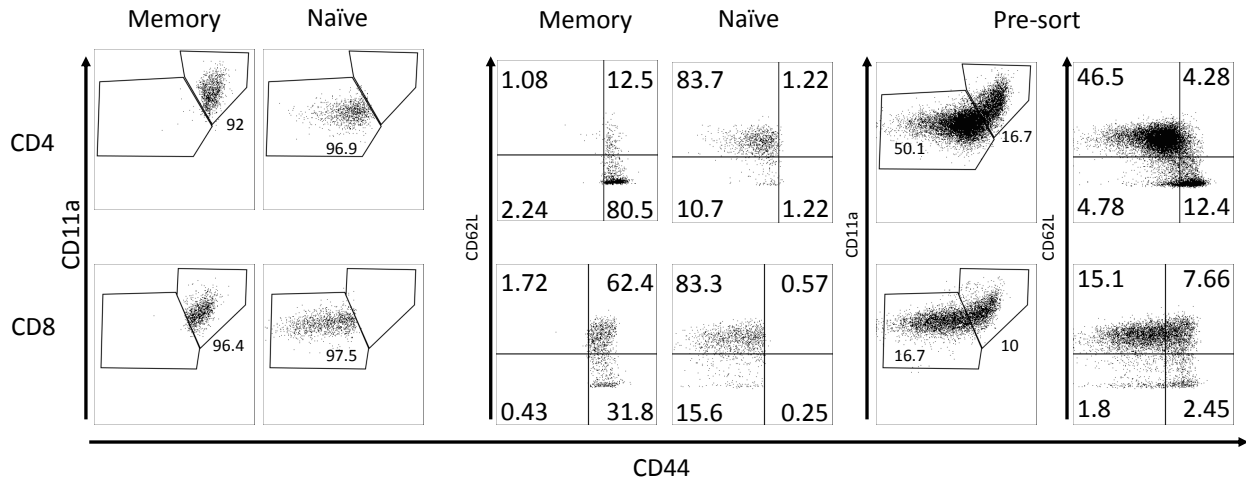

**Supplemental Figure 5. Fluorescence assisted cell sorting diagram of CD4 or CD8 memory T cells (CD44<sup>+</sup>/CD11a<sup>+</sup>), with post-sort purity. CD62L/CD44 purity is also shown along with pre-sort diagrams.**

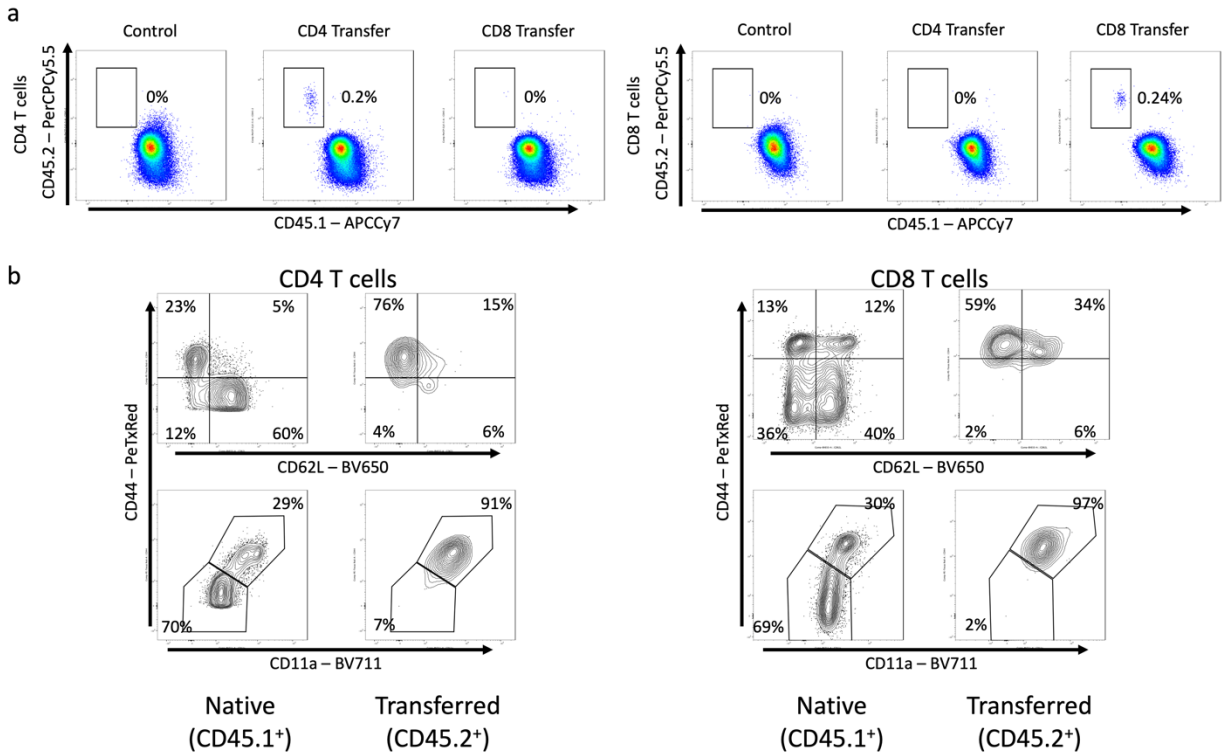

**Supplemental Figure 6. Adoptive Transfer Efficiency.** Flow-cytometry assisted sorted CD4 memory T cells or CD8 memory T cells from C57Bl/6 (CD45.2<sup>+</sup>) mice were transferred into congenic B6.SJL (CD45.1<sup>+</sup>) mice. Seven days later, these mice and untreated control mice underwent CLP. Spleens were harvested 24 hrs. following CLP. Splenic T cells were analyzed for CD45.1 expression (native) and CD45.2 expression (transferred), and for markers of T cell memory (CD44/CD62L/CD11a). Gating: FSC/SSC, singlets, Live, CD90/CD4, CD90/CD8, CD45.1/CD45.2, CD44/CD62L or CD44/CD11a. N=3-5/group

a. Flow cytometric plots of CD4 T cells (left) and CD8 T cells (right) by CD45.1/CD45.2. Gate shows transferred T cells, number represents percentage of parent.

b. Flow cytometric plots of native (CD45.1<sup>+</sup>) and transferred (CD45.2<sup>+</sup>) CD4 (left) and CD8 (right) T cells by CD44/CD62L (top) and CD44/CD11a (bottom). Numbers represent percentage of parent in gate.
